# Supplementary material
Source: publisher figshare collection journal article supplement (https://acs.figshare.com/ndownloader/files/14847200)
Supplement: Supplementary file 1 [file 14847200]

## Supporting Information

### **Using Nanoscopy to Probe the Biological Activity of Antimicrobial Leads That Display Potent Activity Against Pathogenic, Multi-drug Resistant, Gram-negative Bacteria.**

*Kirsty L Smitten,<sup>1</sup> Hannah M Southam\*,<sup>2</sup> Jorge Bernardino de la Serna,<sup>3,4</sup> Martin R Gill,<sup>1,5</sup> Paul J Jarman,<sup>6</sup> Carl G W Smythe,<sup>6</sup> Robert K Poole\*,<sup>2</sup> and Jim A Thomas\*<sup>1</sup>*

<sup>1</sup>*Department of Chemistry, The University of Sheffield, Western Bank, Sheffield S3 7HF, UK*

<sup>2</sup>*Department of Molecular Biology and Biotechnology, The University of Sheffield, Western Bank, Sheffield S10 2TN, UK*

<sup>3</sup>*Central Laser Facility, Rutherford Appleton Laboratory, Research Complex at Harwell, Science and Technology Facilities Council, Harwell-Oxford, Didcot OX11 0QX, UK*

<sup>4</sup>*Department of Physics, King's College London, London, UK*

<sup>5</sup>*Current address: CRUK/MRC Oxford Institute for Radiation Oncology, Department of Oncology, University of Oxford, Oxford, UK*

<sup>6</sup>*Department of Biomedical Science, The University of Sheffield, Western Bank, Sheffield S10 2TN, UK*

---

## TABLE OF CONTENTS

---

### S1. Supplementary Data

S1a. UV-vis absorption data

S1b. Emission data

S1c. Comparison of LogP

S1d. CFU/mL counts for the uptake experiments

S1e. Accumulation effects ICP-AES

S1f. DNA binding studies

S1g. Galleria Mellonella supplementary data

S1h. Structure of  $[\text{Ru}(\text{Phen})_2(\text{tpphz})]^{2+}$

S1i. BacLight<sup>TM</sup> membrane polarisation assay

### S2. Instrumentation

S2a. Microscopy

S2b. Photochemistry

S2c. Mass Spectrometry

S2d. NMR Spectroscopy

S2e. Electron Microscopy

# S1a. UV-Vis absorption data

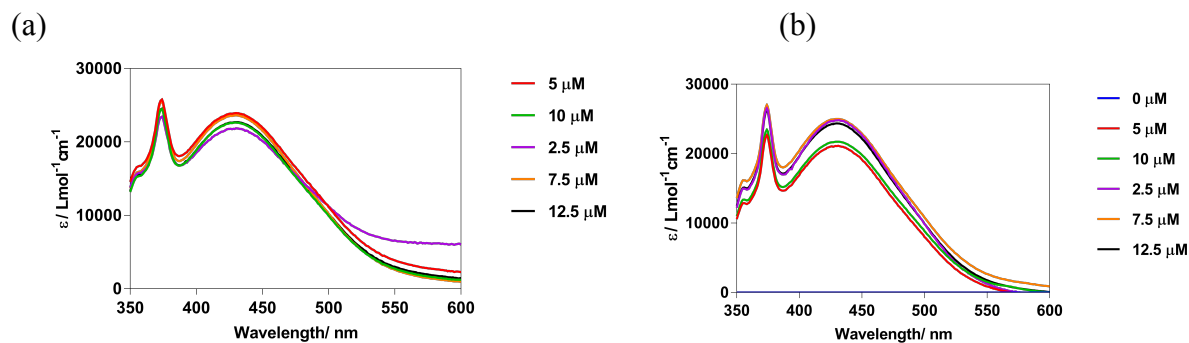

**Figure 1.** UV-Vis absorption spectrum showing the change in molar extinction coefficient upon increasing concentration of  $[\text{Ru}(\text{3,4,7,8-tetramethyl-1,10-phenanthroline})_2]_2(\text{tpphz})$  in MeCN (a) and water (b). Conducted on a Cary 300 UV/Vis spectrophotometer at 27.5 °C.

**Table 1.** UV-Vis spectroscopy data showing the molar extinction coefficient and absorption maxima for the four  $[\text{Ru}(\text{N-N})_2]_2(\text{tpphz})$  in water (a) and MeCN (b). Conducted on a Cary 300 UV/Vis spectrophotometer at 27.5 °C.

| Complex                           | $\lambda_{\text{max}}/\text{nm}$ | $\epsilon/\text{M}^{-1}\text{cm}^{-1}$ | Transition |
|-----------------------------------|----------------------------------|----------------------------------------|------------|
| <b>a<sub>1</sub><sup>4+</sup></b> | 450                              | 34000                                  | MLCT       |
| <b>a<sub>2</sub><sup>4+</sup></b> | Not water soluble                | -                                      | -          |
| <b>a<sub>3</sub><sup>4+</sup></b> | 454                              | 25300                                  | MLCT       |
| <b>a<sub>4</sub><sup>4+</sup></b> | 430                              | 22833                                  | MLCT       |
| <b>b<sub>1</sub><sup>4+</sup></b> | 450                              | 27000                                  | MLCT       |
| <b>b<sub>2</sub><sup>4+</sup></b> | 450                              | 41000                                  | -          |
| <b>b<sub>3</sub><sup>4+</sup></b> | 449                              | 22700                                  | MLCT       |
| <b>b<sub>4</sub><sup>4+</sup></b> | 432                              | 19498                                  | MLCT       |

## S1b. Emission data

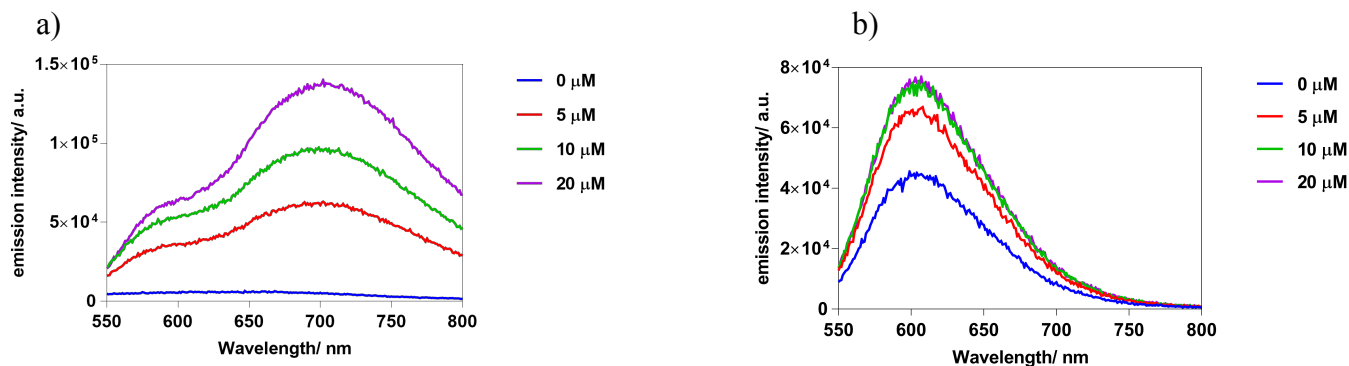

**Figure 2.** Emission spectra at increasing concentration of  $[Ru(3,4,7,8\text{-tetramethyl-1,10-phenanthroline})_2]^{2+}(tpphz)$  between 550-800 nm in MeCN (a) and water (b). Conducted on a Fluoromax 3 fluorimeter at 27.5 °C.

**Table 2.** Luminescent emission data showing the molar extinction coefficient and absorption maxima for the four  $[Ru(N-N)_2]^{2+}(tpphz)$  in water) and MeCN. Conducted on a Fluoromax 3 fluorimeter at 27.5 °C.

| Complex               | $\lambda_{\text{max}}/\text{nm}$ (MeCN) | $\lambda_{\text{max}}/\text{nm}$ (water) |
|-----------------------|-----------------------------------------|------------------------------------------|
| <b>1<sup>4+</sup></b> | 710                                     | -                                        |
| <b>2<sup>4+</sup></b> | 660                                     | Not water soluble                        |
| <b>3<sup>4+</sup></b> | 670                                     | 600                                      |
| <b>4<sup>4+</sup></b> | 670                                     | 650                                      |

\*Data from reference 10. – signifies quenched luminescence.

### S1c. Comparison of LogP

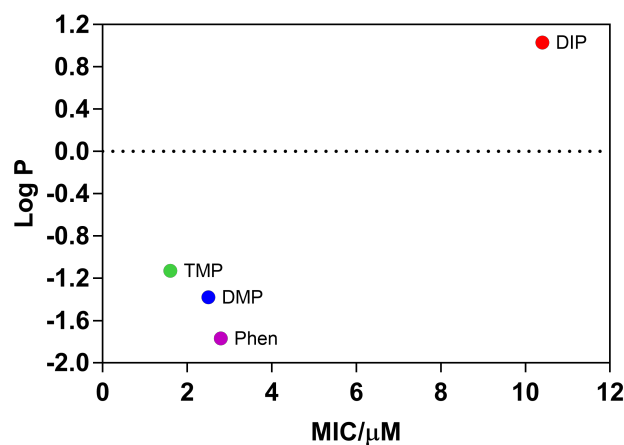

**Figure 3.** A comparison of the LogP values determined and the activity (MIC) of each complex against the pathogenic *E. coli* strain EC958, to show the increase in activity with relative increase in lipophilicity. LogP data was collected using the shake flask procedure.

### S1d. CFU/mL counts for the uptake experiments

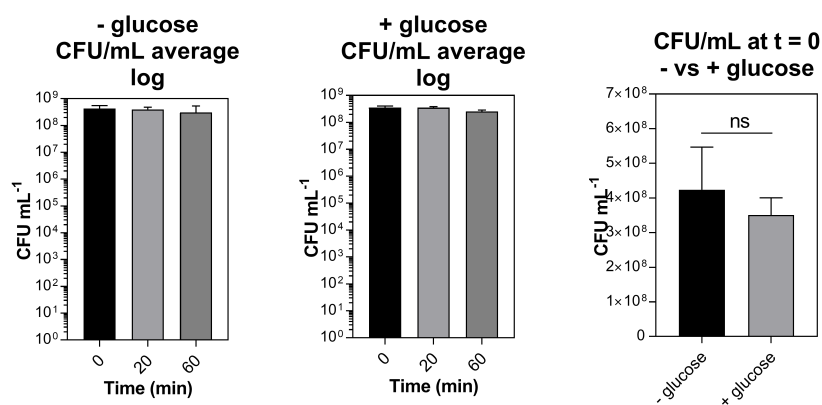

**Figure 4.** CFU/mL counts for the accumulation experiment of 4<sup>4+</sup> by EC958, to ensure that the number of bacteria in the solution maintained constant between each time point.

### S1e. Accumulation effects ICP-AES

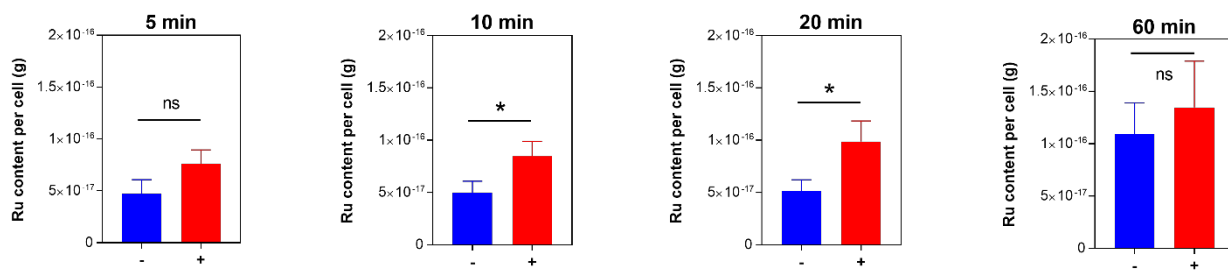

**Figure 5.** The difference in Ru content per cell (g) at each time point (+) with glucose and (-) without glucose. Showing significant differences in accumulation of ruthenium in the (+) with glucose sample at 10 and 20 minutes. Ruthenium content per cell determined via ICP-AES.

### S1f. DNA binding studies with CT-DNA

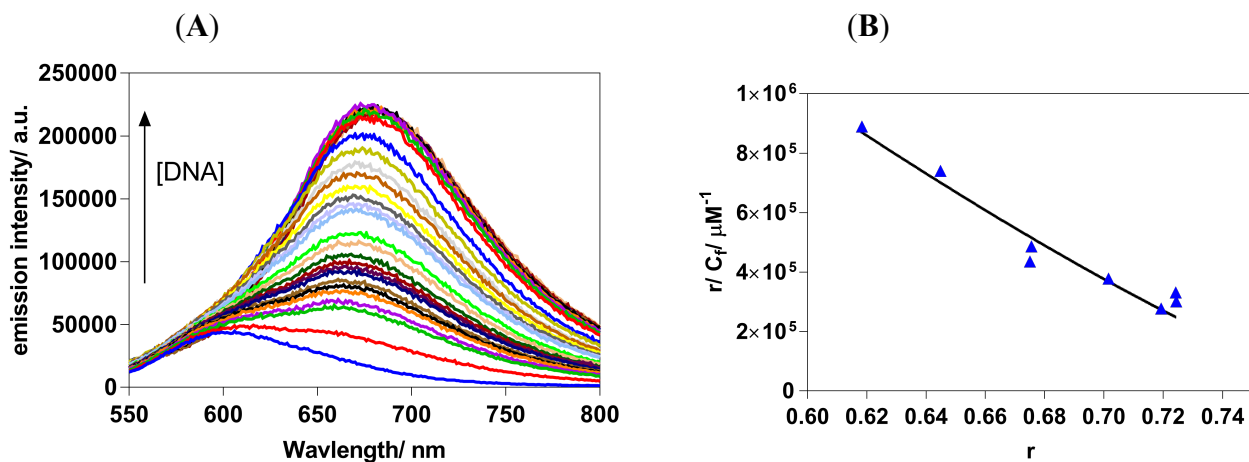

**Figure 6.** (A) DNA binding titration using increasing concentrations of CT-DNA and  $4^{4+}$  in Tris buffer at 27 °C, conducted on a Fluoromax 3 (B) Scatchard plot and McGhee Von Hippel fit, to find the binding constant of  $4^{4+}$

**Table 3** DNA binding constants, and site sizes of all four compounds in the study

| Complex               | I <sub>b</sub> /I <sub>f</sub> | K <sub>b</sub>    | n               |
|-----------------------|--------------------------------|-------------------|-----------------|
| <b>1<sup>4+</sup></b> | 60                             | $1.1 \times 10^7$ | 2.9             |
| <b>2<sup>4+</sup></b> | 17                             | $5.6 \times 10^6$ | $1.26 \pm 0.02$ |
| <b>3<sup>4+</sup></b> | 27                             | $6.7 \times 10^6$ | $1.45 \pm 0.02$ |
| <b>4<sup>4+</sup></b> | 10                             | $2.4 \times 10^6$ | $0.92 \pm 0.02$ |

S1g. *Galleria Mellonella* supplementary data

**Table 4** Log-rank (Mantel-Cox) tests on the Kaplan-Meier survival curves to determine whether a significant difference is observed between the control (water) and compound injected *Galleria* survival percentages. *Galleria* were injected with 10 µL of compound (0-80 mg/kg) and stored at 37.5 degrees for 120 hours.

| Concentration/ mg/kg | Chi square | P    | Survival curve sig different |
|----------------------|------------|------|------------------------------|
| <b>1</b>             | 0.83       | 0.36 | No                           |
| <b>5</b>             | 0.83       | 0.36 | No                           |
| <b>10</b>            | 0.83       | 0.36 | No                           |
| <b>20</b>            | 0.87       | 0.35 | No                           |
| <b>40</b>            | 0.87       | 0.35 | No                           |
| <b>80</b>            | 0.02       | 0.88 | No                           |

S1h. Chemical structure of [Ru(phen)<sub>2</sub>(tpphz)]<sup>2+</sup>

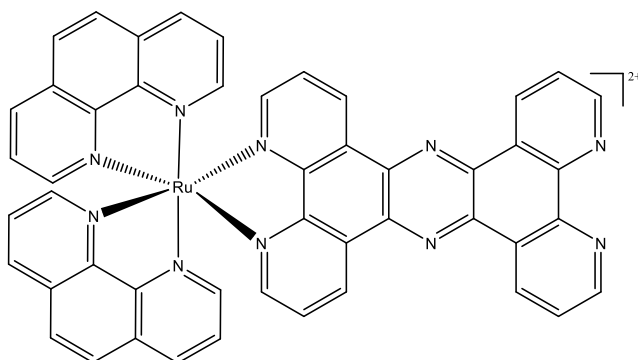

# S1i. BacLight™ membrane polarisation assay

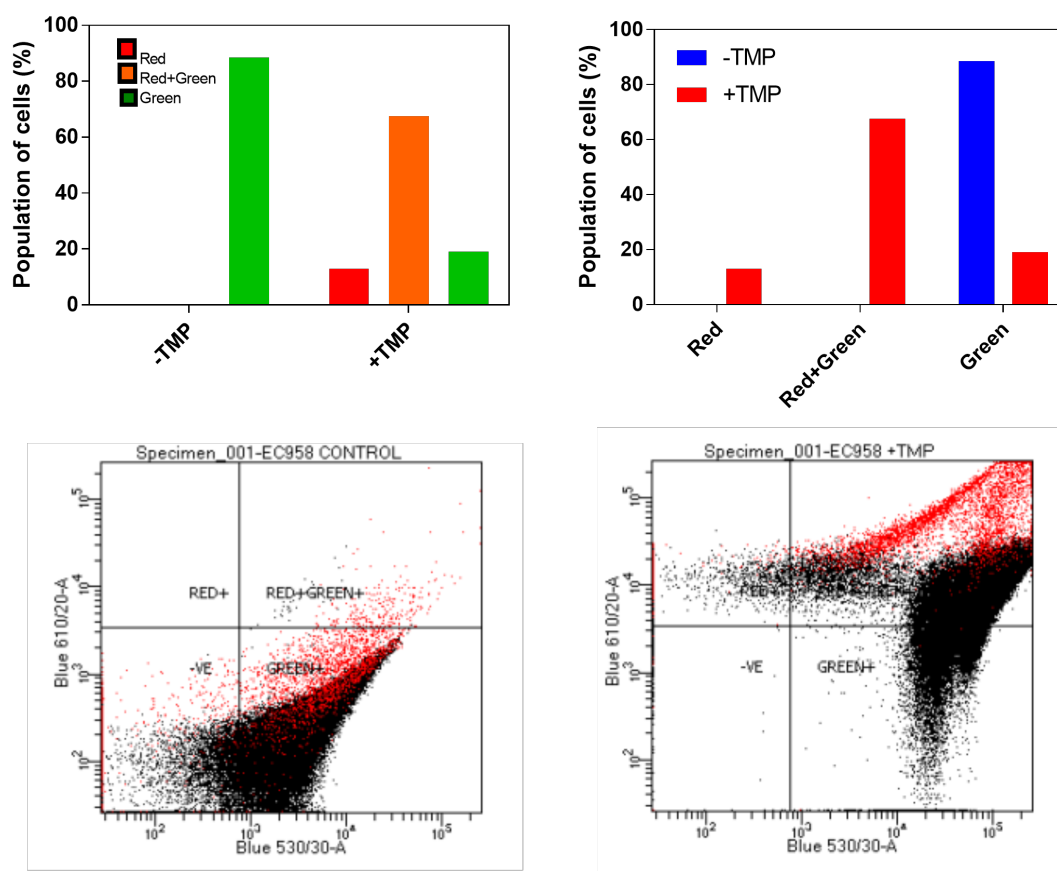

**Figure 7.** (A) Detection of membrane potential in *E. coli* EC958 cells. Percentage population of cells (%) containing red/red+green/green fluorescence are given. Cells were incubated with 30  $\mu$ M of Di-OC<sub>2</sub>(3) for 30 minutes in the presence or absence of 1.6  $\mu$ M of 4<sup>+</sup>. (B) The analysis of the flow cytometry data using red and green fluorescence parameters. The red-versus-green fluorescence dot plots were collected with log amplification.



## S2. Instrumentation

### S2a. Microscopy

Super resolutions microscopy images were taken on a DeltaVision/GE OMX optical microscope (version 4) for structured illumination (SIM) at the Wolfson Microscope Facility in the University of Sheffield. Images were reconstructed using DeltaVision OMX SoftWoRx 6.0 software. All images were analysed using Fiji and Image J software.

### S2b. Photochemistry

Absorption spectra at 200-800 nm for the compounds were obtained with a Cary 50 Scan UV-vis-NIR Spectrophotometer, double beam mode (spectral band width = 2 nm), medium scan speed – 600 nm.

Emission spectra and DNA binding studies for the compound were conducted on the Jobin Yvon Hariba Group FluoroMax®-3 Fluorimeter. DNA binding data was fitted using Origin Software.

UV-Vis absorbance spectroscopy for LogP values were conducted via a SpectraMax M2 Microtitre Plater Reader (Molecular Devices UK).

Turbidity measurements were performed on a Jenway Cary 7350 Spectrophotometer.

### S2c. Mass Spectroscopy

All Mass Spectroscopy was conducted at the Mass Spectroscopy Facility at the University of Sheffield. Mass spectra and accurate mass for the compounds were conducted using a Krato MS80 mass spectrometer working in positive ion mode.

Uptake experiment data was collected using Spectro CirosCCD (Spectro Analysis) Inductively-Coupled Plasma-Atomic Emission Spectrophotometer.

### S2d. NMR Spectroscopy

<sup>1</sup>H NMR spectra were taken on a Bruker AV400 machine and a Bruker AVIIIHD400 machine, both working in Fourier transform mode. All spectra were analysed using “Mestrenova” software.

### S2e. Electron Microscopy

Samples were examined on a FEI Tecnai instrument operating at 80 kV equipped with a Gatan 1 k CCD Camera.
